# Supplementary material for: Antioxidant and Antibacterial Activity of Caprylic Acid Vanillyl Ester Produced by Lipase-Mediated Transesterification
Source: PubMed Central journal article supplement (PMC9723275; doi:10.4014/jmb.2010.10018), 2020-11-10
Supplement: jmb-31-2-317-supple.pdf [file jmb-31-2-317-supple.pdf]

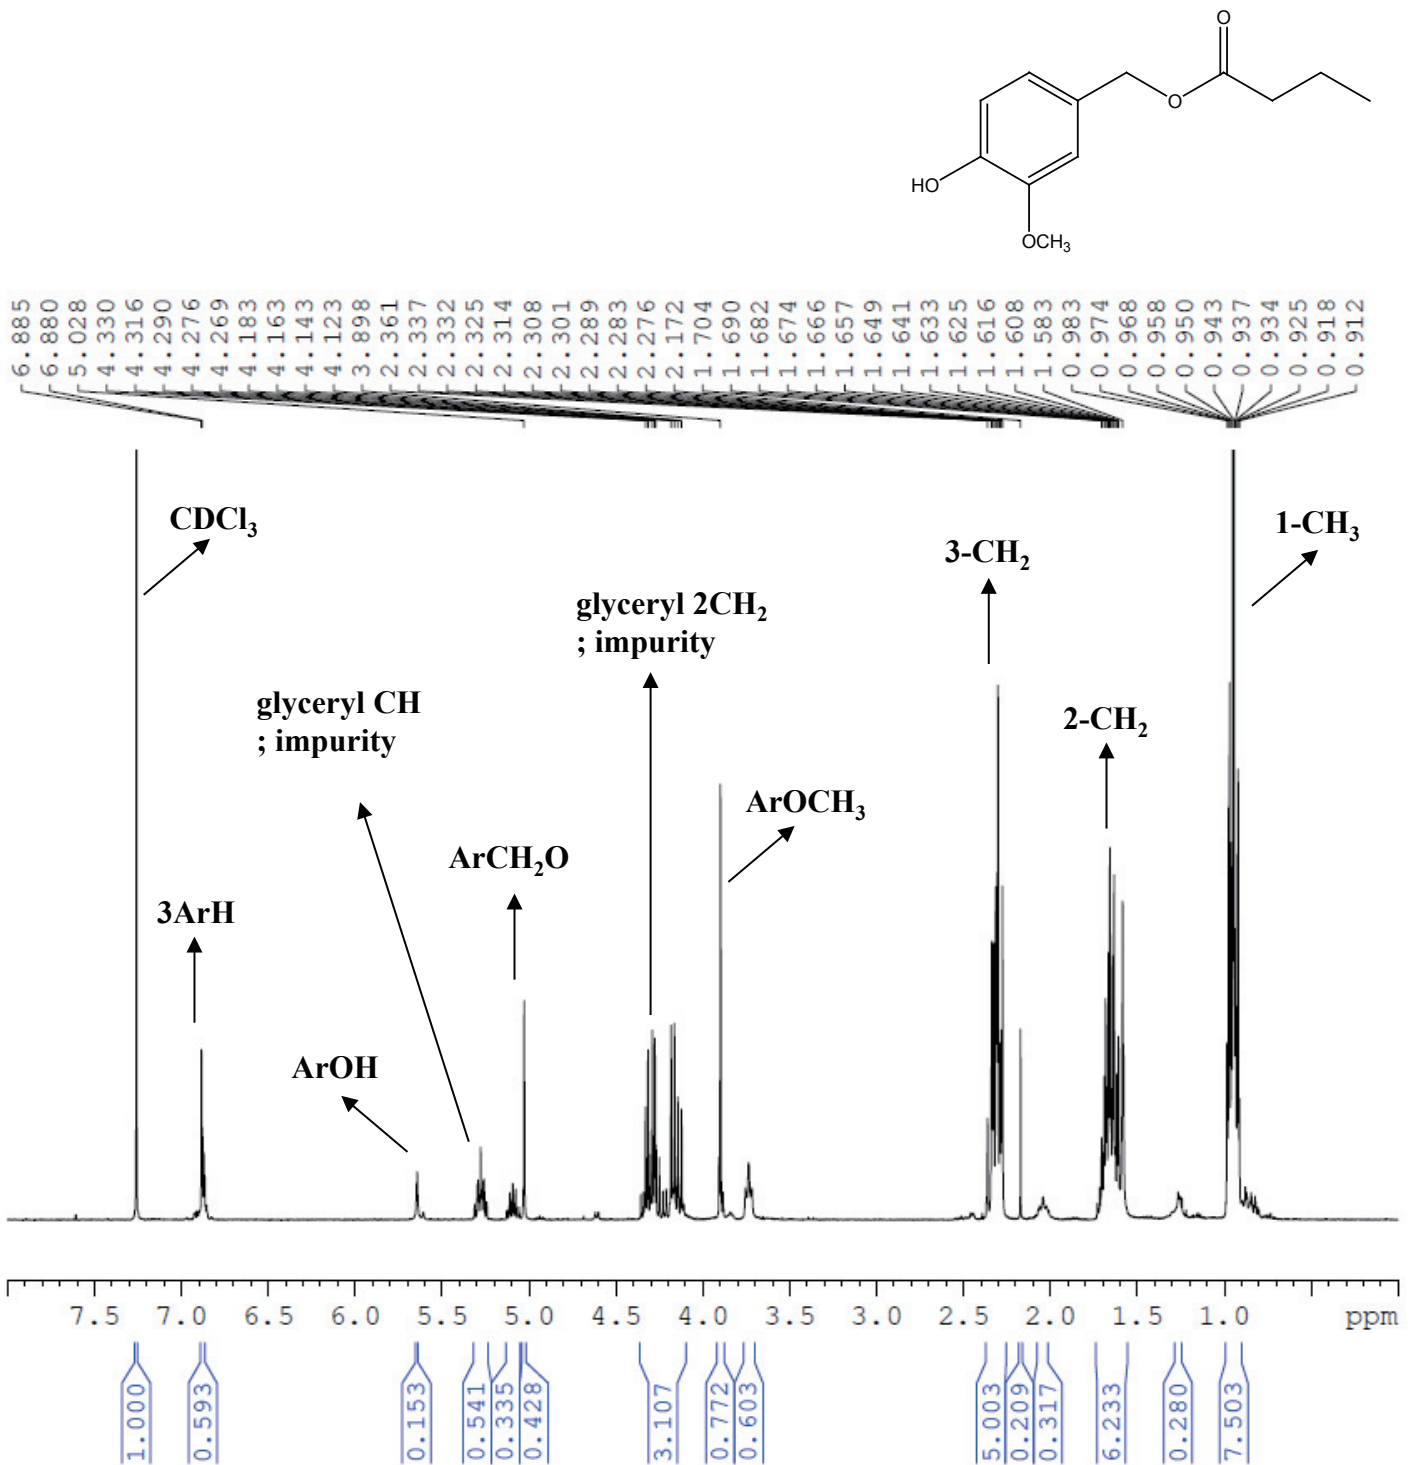

Supplementary Fig. S1. <sup>1</sup>H-NMR (CDCl<sub>3</sub>) spectrum of BAVE

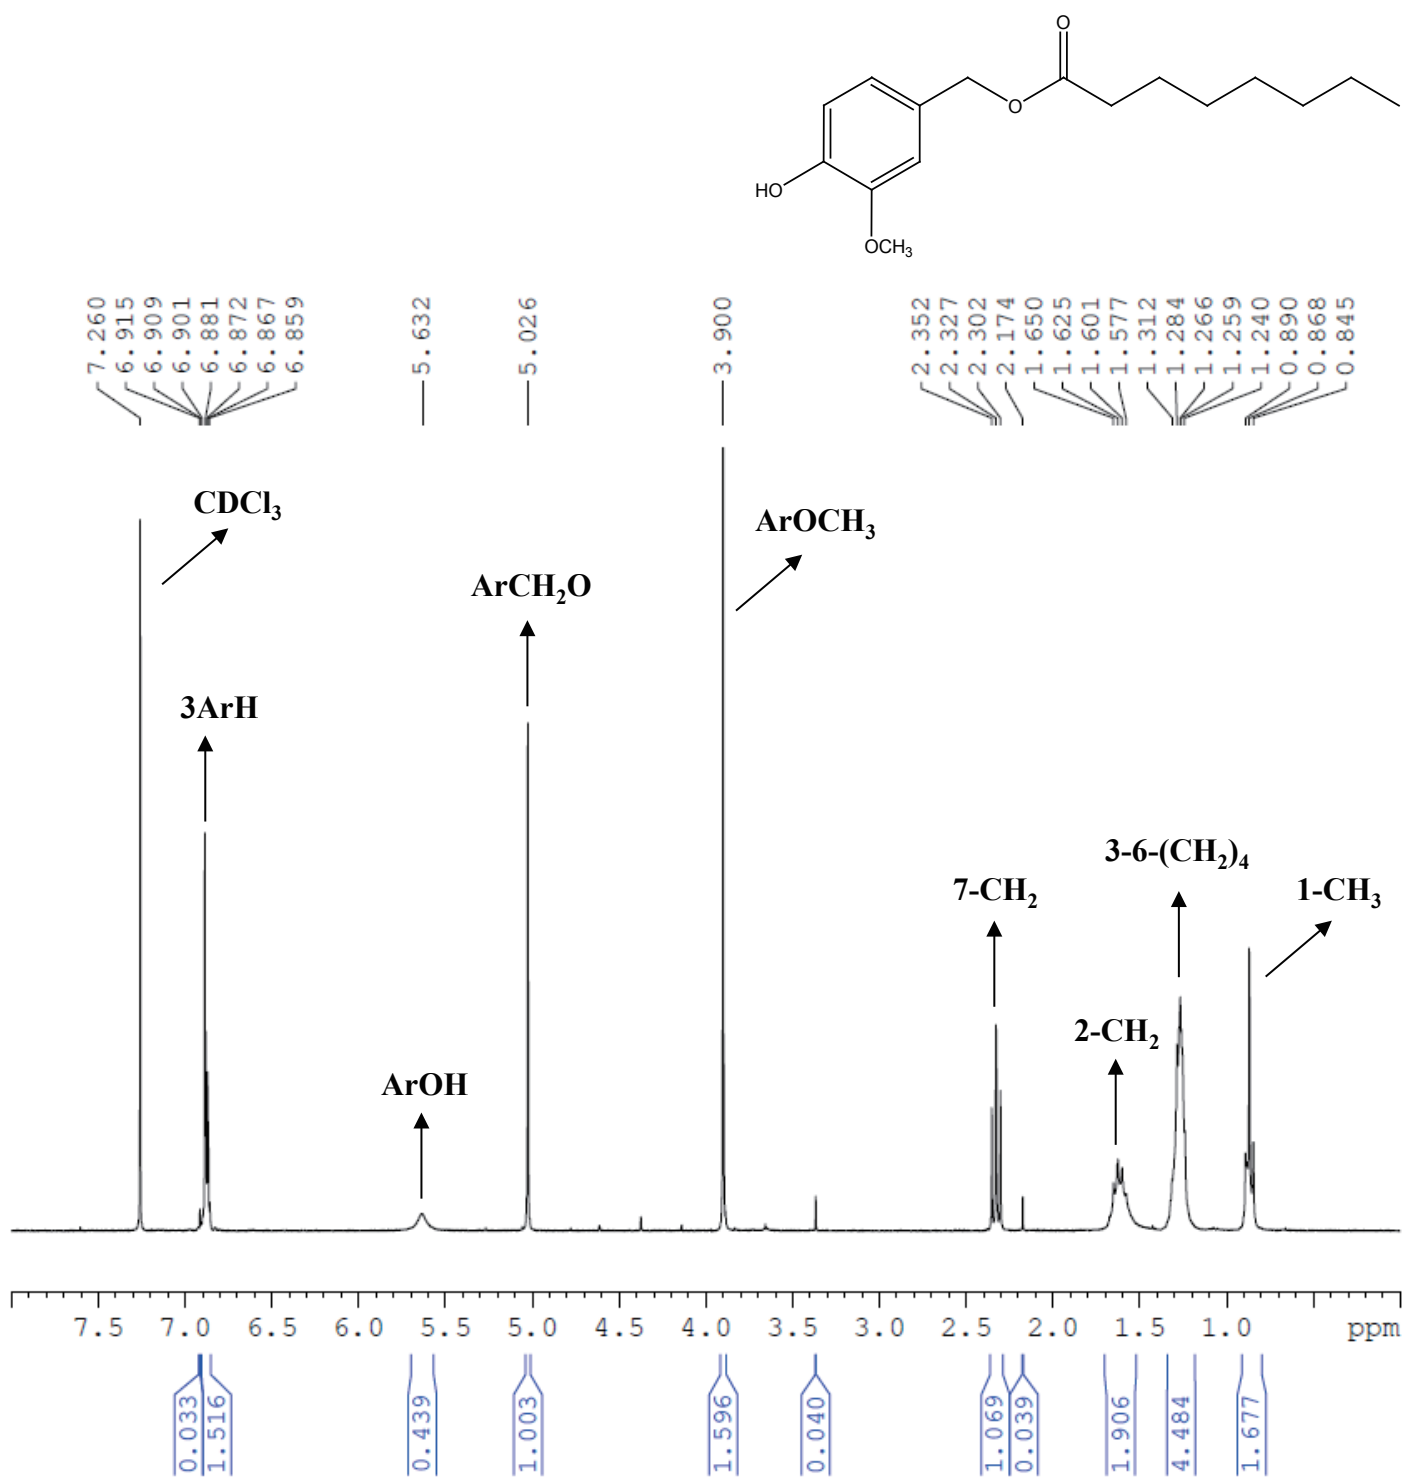

Supplementary Fig. S2. <sup>1</sup>H-NMR (CDCl<sub>3</sub>) spectrum of CAVE
